# Supplementary material for: Adjunctive aripiprazole for antipsychotic-related hyperprolactinaemia in patients with first-episode schizophrenia: a meta-analysis
Source: PubMed Central journal article supplement — Gen Psychiatr. 2019 Oct 17;32(5):e100091. doi: 10.1136/gpsych-2019-100091 (PMC6802974; doi:10.1136/gpsych-2019-100091), 2019-10-17

**Supplemental Table 1. Adjunctive aripiprazole for antipsychotic-related hyperprolactinemia: GRADE analyses**

| Primary/secondary outcome               | Studies (N) | Risk of bias         | Inconsistency        | Indirectness | Imprecision | Publication bias     | Large effect       | Overall quality of evidence <sup>a</sup> |
|-----------------------------------------|-------------|----------------------|----------------------|--------------|-------------|----------------------|--------------------|------------------------------------------|
| Prolactin level in all patients (ng/mL) | 5 (385)     | Serious <sup>b</sup> | Serious <sup>c</sup> | No           | No          | Serious <sup>d</sup> | Large <sup>e</sup> | +/-/-/-; Low                             |
| Prolactin level in females (ng/mL)      | 2 (186)     | Serious <sup>b</sup> | No                   | No           | No          | Serious <sup>d</sup> | Large <sup>e</sup> | +/+/-/-; Moderate                        |
| Prolactin level in males (ng/mL)        | 2 (127)     | Serious <sup>b</sup> | Serious <sup>c</sup> | No           | No          | Serious <sup>d</sup> | Large <sup>e</sup> | +/-/-/-; Low                             |
| Total psychopathology                   | 5 (385)     | Serious <sup>b</sup> | No                   | No           | No          | Serious <sup>d</sup> | No                 | +/-/-/-; Low                             |
| PANSS positive symptoms                 | 3 (213)     | Serious <sup>b</sup> | Serious <sup>c</sup> | No           | No          | Serious <sup>d</sup> | No                 | +/-/-/-; Very low                        |
| PANSS negative symptoms                 | 3 (213)     | Serious <sup>b</sup> | No                   | No           | No          | Serious <sup>d</sup> | No                 | +/-/-/-; Low                             |
| All caused discontinuation              | 2 (180)     | No                   | No                   | No           | No          | Serious <sup>d</sup> | No                 | +/+/-/-; Moderate                        |
| Any extrapyramidal symptoms             | 2 (172)     | No                   | No                   | No           | No          | Serious <sup>d</sup> | No                 | +/+/-/-; Moderate                        |

GRADE = grading of recommendations assessment, development, and evaluation; PANSS = the Positive and Negative Syndrome Scale.

<sup>a</sup>GRADE Working Group grades of evidence: High quality=further research is very unlikely to change our confidence in the estimate of effect. Moderate quality=further research is likely to have an important impact on our confidence in the estimate of effect and may change the estimate. Low quality=further research is very likely to have an important impact on our confidence in the estimate of effect and is likely to change the estimate. Very low quality=we are very uncertain about the estimate.

<sup>b</sup>More than 50% studies reported as having a serious bias used an open-label method, only mentioned random allocation without describing the method and withdrawal from the study.

<sup>c</sup>All studies reported as having a serious inconsistency had  $I^2 > 50\%$ .

<sup>d</sup>For continuous outcomes,  $N < 400$ ; For dichotomous outcomes,  $N < 300$  following the methodology of a previous study<sup>[1]</sup>.

<sup>e</sup>Studies with large effects provided increased quality of evidence. Large effects=standard mean differences  $< -0.8$ .

[1] Bo Q J , Wang Z M , Li X B , et al. Adjunctive metformin for antipsychotic-induced hyperprolactinemia: A systematic review[J]. Psychiatry Res, 2016, 237:257-263.

Supplemental Figure 1: Risk of bias

|                   | Random sequence generation (selection bias) | Allocation concealment (selection bias) | Blinding of participants and personnel | assessment (Symptom reduction, response) | Incomplete outcome data addressed (attrition bias) | Selective reporting (reporting bias) | Other sources of bias |
|-------------------|---------------------------------------------|-----------------------------------------|----------------------------------------|------------------------------------------|----------------------------------------------------|--------------------------------------|-----------------------|
| Chen et al., 2009 | +                                           | ?                                       | +                                      | ?                                        | +                                                  | +                                    | ?                     |
| Chen et al., 2012 | ?                                           | -                                       | -                                      | -                                        | ?                                                  | +                                    | ?                     |
| Ren and Hu 2011   | +                                           | ?                                       | +                                      | ?                                        | +                                                  | -                                    | ?                     |
| Sha et al., 2017  | +                                           | -                                       | -                                      | -                                        | +                                                  | +                                    | ?                     |
| Zhou et al., 2014 | ?                                           | -                                       | -                                      | -                                        | +                                                  | +                                    | ?                     |

+ : Low risk of bias, - : High risk of bias, ? : Unclear risk of bias, nd : not determined

**Supplemental Figure 2:** forest plot for all caused discontinuation and adverse drug reactions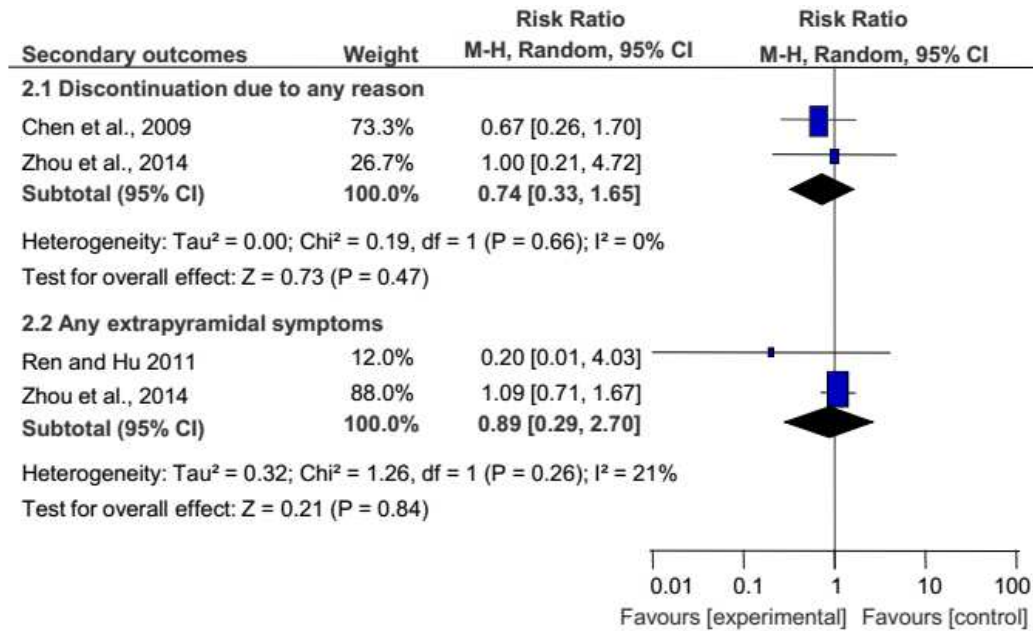

Supplement: gpsych-2019-100091supp001.pdf [file gpsych-2019-100091supp001.pdf]
